# Supplementary material
Source: PubMed Central journal article supplement (PMC3116450)
Supplement: Supp_Data.pdf [file Supp_Data.pdf]

Supplemental Table S1. Hybridization of strains to all microarray probes

| Index | Class          | Name        | Accession No. of gl annotation | Seq 5' to 3'                                                                      | ID                                                                           | SE I27     | SE I28 | SE Tc JF201 | SE Hd JF210 | EC JF220 | EC JF227 | CC 14-22 | CC 141-27 | ECF ATCC25788 | EGM ATCC49573 | LI03 | LI04 | MESA G10-C87-2 | MESA DN | MESA36-1 | MESA59 | CD 70 | CD 98 | CD 112 | CD 113 |   |   |
|-------|----------------|-------------|--------------------------------|-----------------------------------------------------------------------------------|------------------------------------------------------------------------------|------------|--------|-------------|-------------|----------|----------|----------|-----------|---------------|---------------|------|------|----------------|---------|----------|--------|-------|-------|--------|--------|---|---|
| 60    | (-) control    | (-) control |                                | CTAGATCGACCTAGATCGACCTAGATCGACCTAGATCGACCTAGATCGACCTAGATCGACCTAGATCGACCTAGATCGAC  | AR1-0109                                                                     | 1          | 1      | 1           | 1           | 1        | 1        | 1        | 1         | 1             | 1             | 1    | 1    | 1              | 1       | 1        | 1      | 1     | 1     | 1      | 1      |   |   |
| 48    | (-) control    | 50%dms0     |                                |                                                                                   | 50%dms0                                                                      | 1          | 1      | 1           | 1           | 1        | 1        | 1        | 1         | 1             | 1             | 1    | 1    | 1              | 1       | 1        | 1      | 1     | 1     | 1      | 1      |   |   |
| 49    | (-) control    | 50%dms0     |                                |                                                                                   | 50%dms0                                                                      | 1          | 1      | 1           | 1           | 1        | 1        | 1        | 1         | 1             | 1             | 1    | 1    | 1              | 1       | 1        | 1      | 1     | 1     | 1      | 1      |   |   |
| 107   | (-) control    | 50%dms0     |                                |                                                                                   | 50%dms0                                                                      | 1          | 1      | 1           | 1           | 1        | 1        | 1        | 1         | 1             | 1             | 1    | 1    | 1              | 1       | 1        | 1      | 1     | 1     | 1      | 1      |   |   |
| 108   | (-) control    | 50%dms0     |                                |                                                                                   | 50%dms0                                                                      | 1          | 1      | 1           | 1           | 1        | 1        | 1        | 1         | 1             | 1             | 1    | 1    | 1              | 1       | 1        | 1      | 1     | 1     | 1      | 1      |   |   |
| 109   | (-) control    | 50%dms0     |                                |                                                                                   | 50%dms0                                                                      | 1          | 1      | 1           | 1           | 1        | 1        | 1        | 1         | 1             | 1             | 1    | 1    | 1              | 1       | 1        | 1      | 1     | 1     | 1      | 1      |   |   |
| 167   | (-) control    | 50%dms0     |                                |                                                                                   | 50%dms0                                                                      | 1          | 1      | 1           | 1           | 1        | 1        | 1        | 1         | 1             | 1             | 1    | 1    | 1              | 1       | 1        | 1      | 1     | 1     | 1      | 1      |   |   |
| 168   | (-) control    | 50%dms0     |                                |                                                                                   | 50%dms0                                                                      | 1          | 1      | 1           | 1           | 1        | 1        | 1        | 1         | 1             | 1             | 1    | 1    | 1              | 1       | 1        | 1      | 1     | 1     | 1      | 1      |   |   |
| 169   | (-) control    | 50%dms0     |                                |                                                                                   | 50%dms0                                                                      | 1          | 1      | 1           | 1           | 1        | 1        | 1        | 1         | 1             | 1             | 1    | 1    | 1              | 1       | 1        | 1      | 1     | 1     | 1      | 1      |   |   |
| 227   | (-) control    | 50%dms0     |                                |                                                                                   | 50%dms0                                                                      | 1          | 1      | 1           | 1           | 1        | 1        | 1        | 1         | 1             | 1             | 1    | 1    | 1              | 1       | 1        | 1      | 1     | 1     | 1      | 1      |   |   |
| 228   | (-) control    | 50%dms0     |                                |                                                                                   | 50%dms0                                                                      | 1          | 1      | 1           | 1           | 1        | 1        | 1        | 1         | 1             | 1             | 1    | 1    | 1              | 1       | 1        | 1      | 1     | 1     | 1      | 1      |   |   |
| 229   | (-) control    | 50%dms0     |                                |                                                                                   | 50%dms0                                                                      | 1          | 1      | 1           | 1           | 1        | 1        | 1        | 1         | 1             | 1             | 1    | 1    | 1              | 1       | 1        | 1      | 1     | 1     | 1      | 1      |   |   |
| 469   | (-) control    | 50%dms0     |                                |                                                                                   | 50%dms0                                                                      | 1          | 1      | 1           | 1           | 1        | 1        | 1        | 1         | 1             | 1             | 1    | 1    | 1              | 1       | 1        | 1      | 1     | 1     | 1      | 1      |   |   |
| 60    | (-) control    | (-) control | control 1                      | CTAGATCGACCTAGATCGACCTAGATCGACCTAGATCGACCTAGATCGACCTAGATCGACCTAGATCGACCTAGATCGAC  | AR1-0109                                                                     | 1          | 1      | 1           | 1           | 1        | 1        | 1        | 1         | 1             | 1             | 1    | 1    | 1              | 1       | 1        | 1      | 1     | 1     | 1      | 1      |   |   |
| 47    | (+) control    | 16S-1333    | 14                             | NC 000913                                                                         | AGTCGGAATCGTAGTAATCGTGGATCAGAATGCCCGTGAATACGT                                | 16S-1333   | 1      | 2           | 2           | 2        | 2        | 2        | 2         | 2             | 2             | 2    | 2    | 2              | 2       | 2        | 2      | 2     | 2     | 2      | 2      |   |   |
| 409   | (+) control    | 16S-507     | 576                            | NC 000913                                                                         | CTAACTCCGTGCCAGCAGCCGGGTAAATACGGAGGGTGAAGCGTTAA                              | 16S-507    | 576    | 2           | 2           | 2        | 2        | 2        | 2         | 2             | 2             | 2    | 2    | 2              | 2       | 2        | 2      | 2     | 2     | 2      | 2      |   |   |
| 226   | (+) control    | 16S-93      | 162                            | NC 000913                                                                         | TGCTGACGAGTGGCGACGGGTAGTAATGTCTGGAACTGCCTGAT                                 | 16S-93     | 162    | 2           | 2           | 2        | 2        | 2        | 2         | 2             | 2             | 2    | 2    | 2              | 2       | 2        | 2      | 2     | 2     | 2      | 2      |   |   |
| 45    | Aminoglycoside | yeo0        | qi                             | 4637198                                                                           | ACTGTGGTGAAGCGCGACGATGCCGTGGCCCTGCCATGGCGCGCAACAAAGACTCGAAGCTCGAATTC         | AR2-2-0518 | 1      | 1           | 1           | 1        | 1        | 1        | 1         | 1             | 1             | 1    | 1    | 1              | 1       | 1        | 1      | 1     | 1     | 1      | 1      |   |   |
| 24    | Aminoglycoside | strB        | qi                             | 1773964                                                                           | GTTTACGAACCTGACGCCAAGGACCGCTCCCTTGCCTTCCCAAGTTCTGAAAAGAAAGGGTCTGAAAG         | AR2-1-0192 | 1      | 1           | 1           | 1        | 1        | 1        | 1         | 1             | 1             | 1    | 1    | 1              | 1       | 1        | 1      | 1     | 1     | 1      | 1      |   |   |
| 28    | Aminoglycoside | putative st | qi                             | 2788463                                                                           | GATCGACCCAGCGGGTCTATGGGGCGAGTGGTCACTTTCGCAACTGATCTTCAACCCGAGCTG              | AR2-1-0308 | 1      | 1           | 1           | 1        | 1        | 1        | 1         | 1             | 1             | 1    | 1    | 1              | 1       | 1        | 1      | 1     | 1     | 1      | 1      |   |   |
| 24    | Aminoglycoside | strA        | qi                             | 3796271                                                                           | GATATGGTTTGTCCATGGTGTATCCCTGATCGCCGACTTCAATGGTGAACCTTCAATGCA                 | AR2-2-0391 | 1      | 2           | 2           | 2        | 2        | 2        | 2         | 2             | 2             | 2    | 2    | 2              | 2       | 2        | 2      | 2     | 2     | 2      | 2      | 2 |   |
| 46    | Aminoglycoside | aacC2       | qi                             | 45769.8                                                                           | CCGCTGACCTATTGATGTGTCATGCTCCTTAAAGCAATTTGCTCGTGAAGAGGAGGACGGAGCGCT           | AR2-2-0495 | 1      | 1           | 1           | 1        | 1        | 1        | 1         | 1             | 1             | 1    | 1    | 1              | 1       | 1        | 1      | 1     | 1     | 1      | 1      | 1 |   |
| 35    | Aminoglycoside | ntpII       | qi                             | 8344637                                                                           | STTCTTTTGTCCAGACCCGACTGTCCGGTGCCTGAATGAATCCCAAGACGAGGACCGCGCTATCGT           | AR2-2-0675 | 1      | 1           | 1           | 1        | 1        | 1        | 1         | 1             | 1             | 1    | 1    | 1              | 1       | 1        | 1      | 1     | 1     | 1      | 1      | 1 |   |
| 52    | Aminoglycoside | aadA2*      | Salmonella                     | AY055428                                                                          | CTAGATCGACAAAACGCTCCTGCCAGTATCAGCCCGTCTTACTTGAAGTAAAGCAAGCTTATCTGGGCAAAAAGAA | AR1-0005   | 1      | 1           | 1           | 1        | 1        | 1        | 1         | 1             | 1             | 1    | 1    | 1              | 1       | 1        | 1      | 1     | 1     | 1      | 1      | 1 |   |
| 54    | Aminoglycoside | aadA7       | AY055428                       | CTAGATCGACGATCTCTCAGCTCAGTCCAGCAAGGCAATCTTCAAGGCACCTGGCCGATCTCGAAGCTATGGAATC      | AR1-0013                                                                     | 1          | 1      | 1           | 1           | 1        | 1        | 1        | 1         | 1             | 1             | 1    | 1    | 1              | 1       | 1        | 1      | 1     | 1     | 1      | 1      | 1 |   |
| 55    | Aminoglycoside | aadA2*      | AY103460                       | CTAGATCGACCTATTGCGACAGCGGACTCCCTCAACTCGTCAAGGGATGAAACCTATAGAAGACATTTGCTGATGAACCTG | AR1-0017                                                                     | 1          | 2      | 2           | 2           | 2        | 2        | 2        | 2         | 2             | 2             | 2    | 2    | 2              | 2       | 2        | 2      | 2     | 2     | 2      | 2      | 2 |   |
| 56    | Aminoglycoside | aadA2*      | AY103460                       | CTAGATCGACAAAACGCTCCTGCCAGTATCAGCCCGTCTTACTTGAAGTAAAGCAAGCTTATCTGGGCAAAAAGAA      | AR1-0021                                                                     | 1          | 1      | 1           | 1           | 1        | 1        | 1        | 1         | 1             | 1             | 1    | 1    | 1              | 1       | 1        | 1      | 1     | 1     | 1      | 1      | 1 |   |
| 58    | Aminoglycoside | aac(6)-Ib*  | AF439786                       | CTAGATCGACCTCATGACTGAGCATGACCTGGTGTGCTACTGATGGTAAATCGATCTCATATCGTGCAGTGGTGG       | AR1-0101                                                                     | 1          | 1      | 1           | 1           | 1        | 1        | 1        | 1         | 1             | 1             | 1    | 1    | 1              | 1       | 1        | 1      | 1     | 1     | 1      | 1      | 1 |   |
| 97    | Aminoglycoside | aac(6)      | qi                             | 4637195                                                                           | TTTTTCCCTGACAGCTGATAAAGAAACCTCATTATCAAGCTGCCAACTCTTAAATGACGCGGTTC            | AR2-2-0500 | 1      | 1           | 1           | 1        | 1        | 1        | 1         | 1             | 1             | 1    | 1    | 1              | 1       | 1        | 1      | 1     | 1     | 1      | 1      | 1 |   |
| 111   | Aminoglycoside | aadB        | AY204504                       | CTAGATCGACTACTTTTACTATGCCGATGAAGTACCACCCAGTGGACTGGCTGACCAAGCAATAGAGTCTTACAGGCTCG  | AR1-0002                                                                     | 1          | 1      | 1           | 1           | 1        | 1        | 1        | 1         | 1             | 1             | 1    | 1    | 1              | 1       | 1        | 1      | 1     | 1     | 1      | 1      | 1 |   |
| 115   | Aminoglycoside | strA*       | AY055428                       | CTAGATCGACTTTTGGTGAATCGCATTCTGACTGGTGGCTCGAGAGGCGGAGAAATCTGGTGAATTTGTTTTGCGACG    | AR1-0018                                                                     | 1          | 2      | 2           | 2           | 2        | 2        | 2        | 2         | 2             | 2             | 2    | 2    | 2              | 2       | 2        | 2      | 2     | 2     | 2      | 2      | 2 |   |
| 116   | Aminoglycoside | aac(6)-Ib*  | AY103455                       | CTAGATCGACCTCATGACTGAGCATGACCTTCGATGCTCTATGAGTGGCTAAATCGATCTCATATCGTGCAGTGGTGG    | AR1-0022                                                                     | 1          | 1      | 1           | 1           | 1        | 1        | 1        | 1         | 1             | 1             | 1    | 1    | 1              | 1       | 1        | 1      | 1     | 1     | 1      | 1      | 1 |   |
| 118   | Aminoglycoside | aadA1b      | AJ62853                        | CTAGATCGACAGTATCTTTCGAGCAGCCAGCATGACATGATCTGGTATCTTGCCTGACAAAAGCAAGAAACATAGC      | AR1-0102                                                                     | 1          | 1      | 2           | 2           | 2        | 2        | 2        | 2         | 2             | 2             | 2    | 2    | 2              | 2       | 2        | 2      | 2     | 2     | 2      | 2      | 2 |   |
| 131   | Aminoglycoside | kxsA        | qi                             | 146570.1                                                                          | CGATGACCTTTAACTTTTTCGAGCTGGCAGGAAATGGGTACGCGCTGCGTGTTCGCGCAACTGGCC           | AR2-1-0114 | 1      | 1           | 2           | 2        | 2        | 2        | 2         | 2             | 2             | 2    | 2    | 2              | 2       | 2        | 2      | 2     | 2     | 2      | 2      | 2 |   |
| 134   | Aminoglycoside | strB        | qi                             | 1869310                                                                           | TGAACCTATAATCGCTTTCAGGATTAACCTTGTATGCTAGCCATAACCACTCCATCCAGTGTGCTCAACACA     | AR2-1-0198 | 1      | 1           | 1           | 1        | 1        | 1        | 1         | 1             | 1             | 1    | 1    | 1              | 1       | 1        | 1      | 1     | 1     | 1      | 1      | 1 | 1 |
| 135   | Aminoglycoside | strA        | qi                             | 1943584                                                                           | GCGGAGGGCGCGGGTGGACCTGGCCCGCTCTCGAGAAACCCCTGGCAACCCCTGGCAGGACGGGCT           | AR2-1-0202 | 1      | 1           | 1           | 1        | 1        | 1        | 1         | 1             | 1             | 1    | 1    | 1              | 1       | 1        | 1      | 1     | 1     | 1      | 1      | 1 | 1 |
| 138   | Aminoglycoside | aadA2       | qi                             | 2148384                                                                           | TCAGCCCGTCTTACTTGAAGCTAAGCAAGCTTATCTGGGCAAAAAGAGTCTTCTGGCTCACGCGCA           | AR2-1-0214 | 1      | 1           | 2           | 2        | 2        | 2        | 2         | 2             | 2             | 2    | 2    | 2              | 2       | 2        | 2      | 2     | 2     | 2      | 2      | 2 | 2 |
| 143   | Aminoglycoside | aadA21      | qi                             | 2736813                                                                           | GTAGCCGTGACCATGAAATTCGAACCAACTATCGAGGTGTCATAGCTCATGAGCCATCTGGAAT             | AR2-1-0306 | 1      | 1           | 2           | 2        | 2        | 2        | 2         | 2             | 2             | 2    | 2    | 2              | 2       | 2        | 2      | 2     | 2     | 2      | 2      | 2 | 2 |
| 152   | Aminoglycoside | kac         | qi                             | 4488600                                                                           | GATGTGAAGAGCTCGAAGACTCTCGAGAAACCCGAGTGGCCGCTTGGTGGTCCAGCCCGATGACT            | AR2-2-0481 | 1      | 1           | 1           | 1        | 1        | 1        | 1         | 1             | 1             | 1    | 1    | 1              | 1       | 1        | 1      | 1     | 1     | 1      | 1      | 1 | 1 |
| 171   | Aminoglycoside | aphAI       | U13633                         | CTAGATCGACTGCTCGAGGCGCGGATTAATTCACCACTGGATGCTGATTTATGGGTATAGATGGGCTCGGATAATG      | AR1-0003                                                                     | 1          | 1      | 2           | 2           | 2        | 2        | 2        | 2         | 2             | 2             | 2    | 2    | 2              | 2       | 2        | 2      | 2     | 2     | 2      | 2      | 2 |   |
| 179   | Aminoglycoside | strA*       | AJ628353                       | CTAGATCGACTTTTGGTGAATCGCATTCTGACTGGTGGCTCGAGAGGCGGAGAAATCTGGTGAATTTGTTTTGCGACG    | AR1-0107                                                                     | 1          | 2      | 2           | 2           | 2        | 2        | 2        | 2         | 2             | 2             | 2    | 2    | 2              | 2       | 2        | 2      | 2     | 2     | 2      | 2      | 2 |   |
| 191   | Aminoglycoside | aad9        | qi                             | 148301.2                                                                          | GCCGATGATTTAACTATGAGACCGGTAATAATCATACCAAAAGATATTCGCGGAAATGCAGTGGCTGA         | AR2-1-0115 | 1      | 1           | 1           | 1        | 1        | 1        | 1         | 1             | 1             | 1    | 1    | 1              | 1       | 1        | 1      | 1     | 1     | 1      | 1      | 1 | 1 |
| 207   | Aminoglycoside | aph(3)-I    | qi                             | 3796271                                                                           | TTTCGATCTCTGTTTGTAAATGTCCTTTTAAACAGCATCGCGTATTTTCGCTCGCTCAGGCGCAATCACGA      | AR2-2-0390 | 1      | 1           | 2           | 2        | 2        | 2        | 2         | 2             | 2             | 2    | 2    | 2              | 2       | 2        | 2      | 2     | 2     | 2      | 2      | 2 | 2 |
| 211   | Aminoglycoside | aac(3)-Id   | qi                             | 3849004                                                                           | TCCATCTCACTGGAAGCATGTTGGCTGTTTCGAGTCAATAAATGCCATGTTTCGCGAGGCAATCAACGA        | AR2-2-0406 | 1      | 1           | 1           | 1        | 1        | 1        | 1         | 1             | 1             | 1    | 1    | 1              | 1       | 1        | 1      | 1     | 1     | 1      | 1      | 1 | 1 |
| 212   | Aminoglycoside | aacC3       | qi                             | 45264.1                                                                           | CTTTGCTGACCCGTAATCACCGCTGGATTTGGCTACGAGTTCGAGTGGCTCGCCCTGGCTAACTGGTGGC       | AR2-2-0482 | 1      | 1           | 1           | 1        | 1        | 1        | 1         | 1             | 1             | 1    | 1    | 1              | 1       | 1        | 1      | 1     | 1     | 1      | 1      | 1 | 1 |
| 217   | Aminoglycoside | glmS        | qi                             | 4637195                                                                           | GCTGGTGAACACTTCCCGCTCAGTATTTGGCTTGGCTTGCACCACTGCAAGGGTACGATACGTA             | AR2-2-0502 | 1      | 1           | 1           | 1        | 1        | 1        | 1         | 1             | 1             | 1    | 1    | 1              | 1       | 1        | 1      | 1     | 1     | 1      | 1      | 1 | 1 |
| 222   | Aminoglycoside | strB        | qi                             | 5623698                                                                           | AATATGTTCTACAGTCCGGCTGACAGAGACACTTGGCTTCTGATCTAGACCTGACAGTGGCGG              | AR2-2-0594 | 1      | 2           | 2           | 2        | 2        | 2        | 2         | 2             | 2             | 2    | 2    | 2              | 2       | 2        | 2      | 2     | 2     | 2      | 2      | 2 | 2 |
| 223   | Aminoglycoside | aacA4       | qi                             | 5678661                                                                           | CGATCCAGGAGTACGCGGAATAGACCACTGCGGGAATGATCAACTGGGCAAAAGGCTTGGGAAACC           | AR2-2-0598 | 1      | 1           | 1           | 1        | 1        | 1        | 1         | 1             | 1             | 1    | 1    | 1              | 1       | 1        | 1      | 1     | 1     | 1      | 1      | 1 | 1 |
| 224   | Aminoglycoside | aacC1       | qi                             | 8344634                                                                           | GCGCCGCTAGTGGATCTATATCTATGACTTCGAGTCTCCGCGGAGCAGCGGAGGCAAGGCTATGCG           | AR2-2-0674 | 1      | 1           | 1           | 1        | 1        | 1        | 1         | 1             | 1             | 1    | 1    | 1              | 1       | 1        | 1      | 1     | 1     | 1      | 1      | 1 | 1 |
| 231   | Aminoglycoside | aadA1       | NC 003198                      | CTAGATCGACTCATATCGTTTAAACCCCTGGCGGATCTGGTACACCTTTCTACCGGAGATTTACTCTAAGGATGG       | AR1-0004                                                                     | 2          | 2      | 2           | 2           | 2        | 2        | 2        | 2         | 2             | 2             | 2    | 2    | 2              | 2       | 2        | 2      | 2     | 2     | 2      | 2      | 2 |   |
| 233   | Aminoglycoside | aac         | AY458224                       | CTAGATCGACATTAATAAACTCAAGGCTATAGGCGCAGCGGTGAGGCTTATGATTTACGTCCAAGCTGATAAAGCGG     | AR1-0012                                                                     | 1          | 1      | 1           | 1           | 1        | 1        | 1        | 1         | 1             | 1             | 1    | 1    | 1              | 1       | 1        | 1      | 1     | 1     | 1      | 1      | 1 |   |
| 236   | Aminoglycoside | aac(6)-Ib*  | X13542                         | CTAGATCGACAACTCGCTGGAAACGCGCATCAGAATGACTTCAACCGGCTTCTCGATGCTTGTCTCGAAGGAA         | AR1-0024                                                                     | 1          | 1      | 1           | 1           | 1        | 1        | 1        | 1         | 1             | 1             | 1    | 1    | 1              | 1       | 1        | 1      | 1     | 1     | 1      | 1      | 1 |   |
| 239   | Aminoglycoside | aac(6)-Ib*  | NC 004998                      | CTAGATCGACCTCATGACTGAGCATGACCTGGTGTGCTTATGAGTGGCTAAATCGATCTCATATCGTGCAGTGGTGG     | AR1-0108                                                                     | 1          | 1      | 2           | 2           | 2        | 2        | 2        | 2         | 2             | 2             | 2    | 2    | 2              | 2       | 2        | 2      | 2     | 2     | 2      | 2      | 2 |   |
| 254   | Aminoglycoside | aadE        | qi                             | 2188673                                                                           | TATGGGAGCATTATTTCTATGCCATCAATGTTTCAGGCGGATTCGGTGAAGGCTGGCGGAAAGCTCTTCA       | AR2-1-0220 | 1      | 1           | 1           | 1        | 1        | 1        | 1         | 1             | 1             | 1    | 1    | 1              | 1       | 1        | 1      | 1     | 1     | 1      | 1      | 1 | 1 |
| 260   | Aminoglycoside | aacA        |                                |                                                                                   |                                                                              |            |        |             |             |          |          |          |           |               |               |      |      |                |         |          |        |       |       |        |        |   |   |
